# Supplementary material for: A luminescent silver–phosphine tetragonal cage based on tetraphenylethylene
Source: Royal Society of Chemistry journal article supplement (doi:10.1039/c5dt04319k), 2015-12-14
Supplement: c5dt04319k1.pdf [file c5dt04319k1.pdf]

## Electronic Supplementary Information

A luminescent silver-phosphine tetragonal cage based on  
tetraphenylethylene

Juan Feng, Liu Yao, Jianyong Zhang,\* Yingxiao Mu, Zhenguo Chi and Cheng-Yong Su

*MOE Laboratory of Bioinorganic and Synthetic Chemistry, Lehn Institute of Functional Materials,  
School of Chemistry and Chemical Engineering, Sun Yat-Sen University, Guangzhou 510275,  
China. Email: zhjyong@mail.sysu.edu.cn*

**Table S1** Fluorescence lifetime data of L and Ag<sub>4</sub>L<sub>2</sub> in solution and in solid state. (The resulting signals were fitted with a double exponential decay function, which obtained the best fit with respect to both the recorded phase and intensity information.)

|                                | Sample                                                               | $\tau_1/\text{ns}^{[a]}$ | $A_1^{[b]}$ | $\tau_2/\text{ns}^{[a]}$ | $A_2^{[b]}$ | $\langle \tau \rangle / \text{ns}^{[c]}$ |
|--------------------------------|----------------------------------------------------------------------|--------------------------|-------------|--------------------------|-------------|------------------------------------------|
| L                              | in CHCl <sub>3</sub><br>( $3.64 \times 10^{-5} \text{ mol L}^{-1}$ ) | 0.30                     | 0.66        | 3.08                     | 0.34        | 1.25                                     |
|                                | solid                                                                | 2.84                     | 0.55        | 6.13                     | 0.45        | 4.32                                     |
| Ag <sub>4</sub> L <sub>2</sub> | in CHCl <sub>3</sub><br>( $1.42 \times 10^{-5} \text{ mol L}^{-1}$ ) | 1.24                     | 0.22        | 2.93                     | 0.78        | 2.56                                     |
|                                | solid                                                                | 2.10                     | 0.40        | 3.89                     | 0.60        | 3.17                                     |

<sup>[a]</sup> Fluorescence lifetime. <sup>[b]</sup> Fractional contribution. <sup>[c]</sup> Weighted mean lifetime

$$\langle \tau \rangle = \frac{A_1 \tau_1 + A_2 \tau_2}{A_1 + A_2}.$$

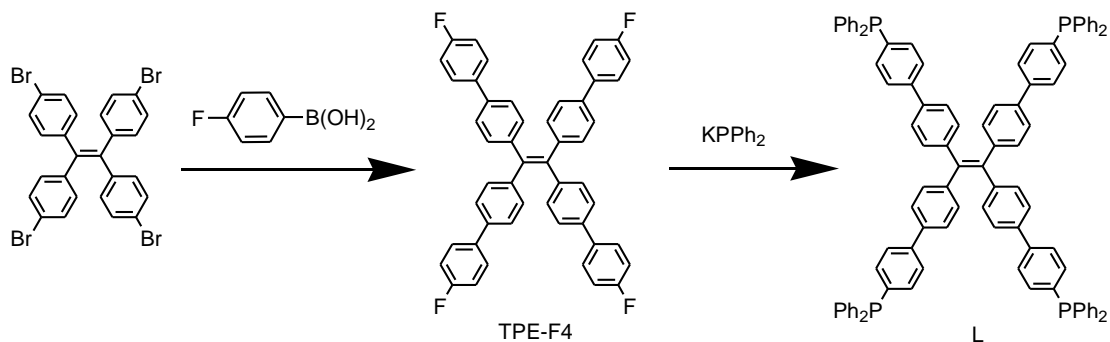

**Scheme S1** Synthetic route for 1,1,2,2-tetrakis(4-diphenylphosphino-(1,1'-biphenyl))ethane (L).

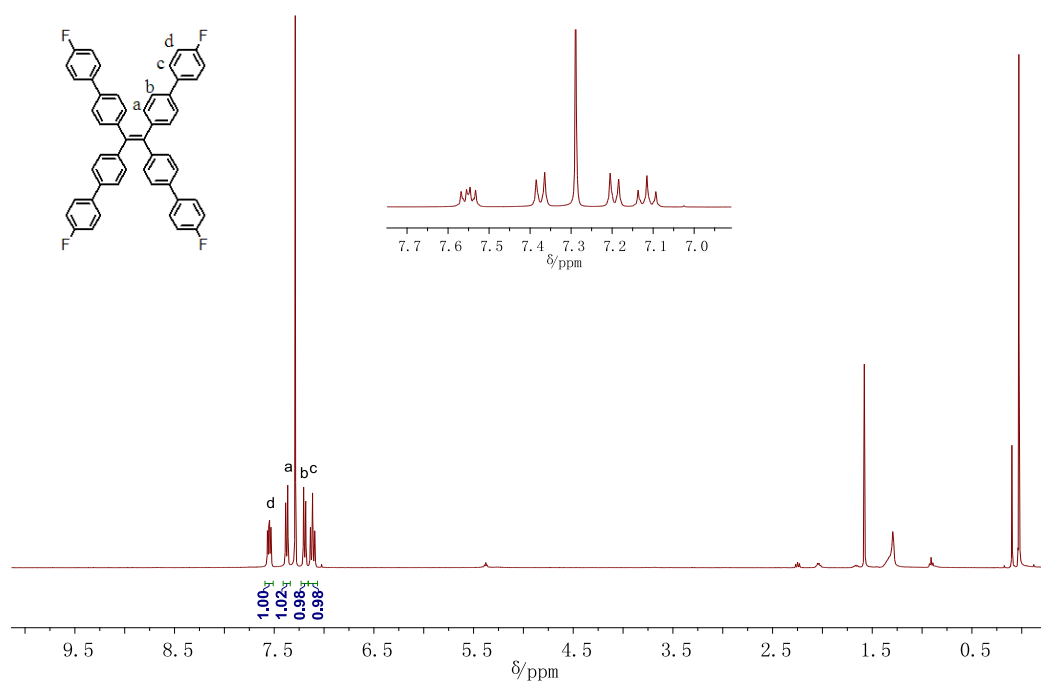

**Fig. S1**  $^1\text{H}$  NMR spectrum (400 MHz,  $\text{CDCl}_3$ ) of TPE-F4.

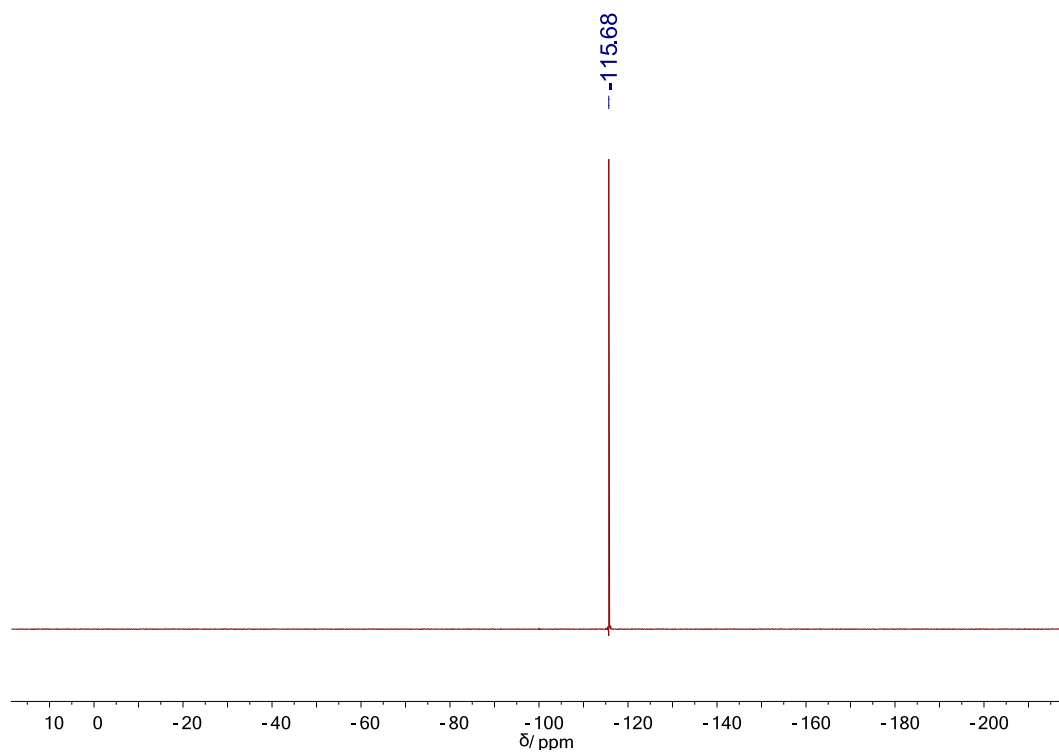

**Fig. S2**  $^{19}\text{F}$  NMR spectrum (377 MHz,  $\text{CDCl}_3$ ) of TPE-F4.

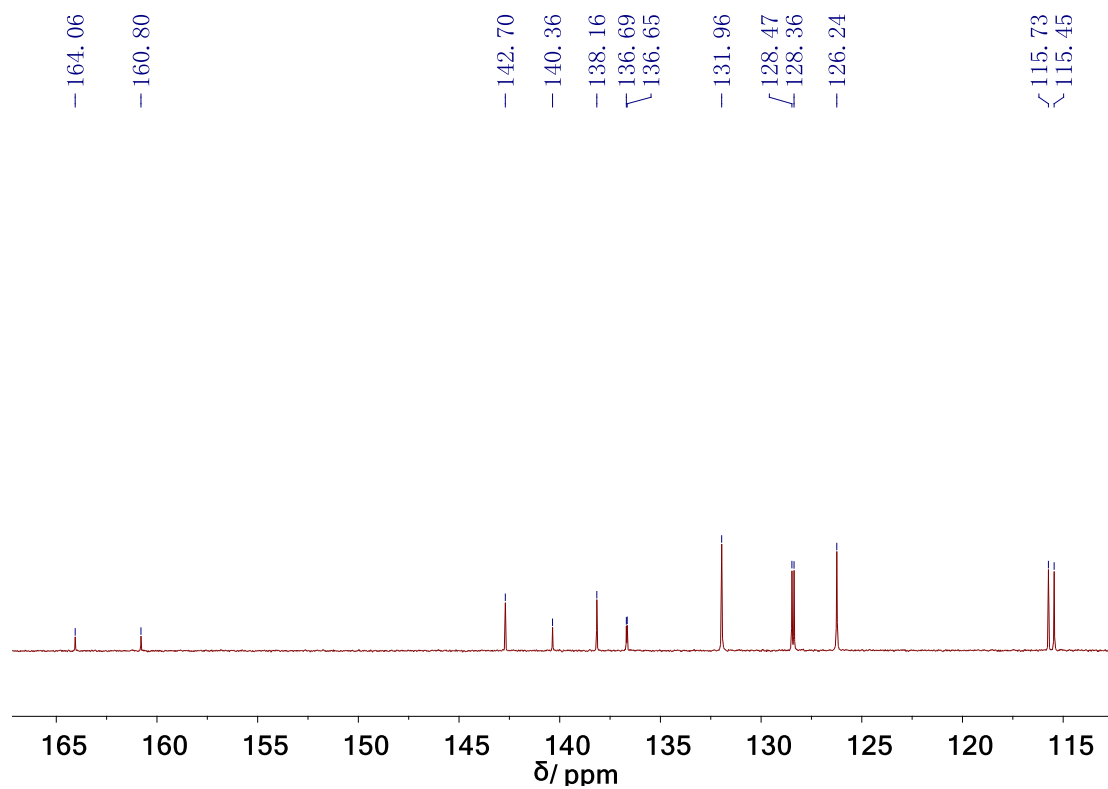

**Fig. S3**  $^{13}\text{C}$  NMR spectrum ( $\text{CDCl}_3$ , 75 MHz) of TPE-F4.

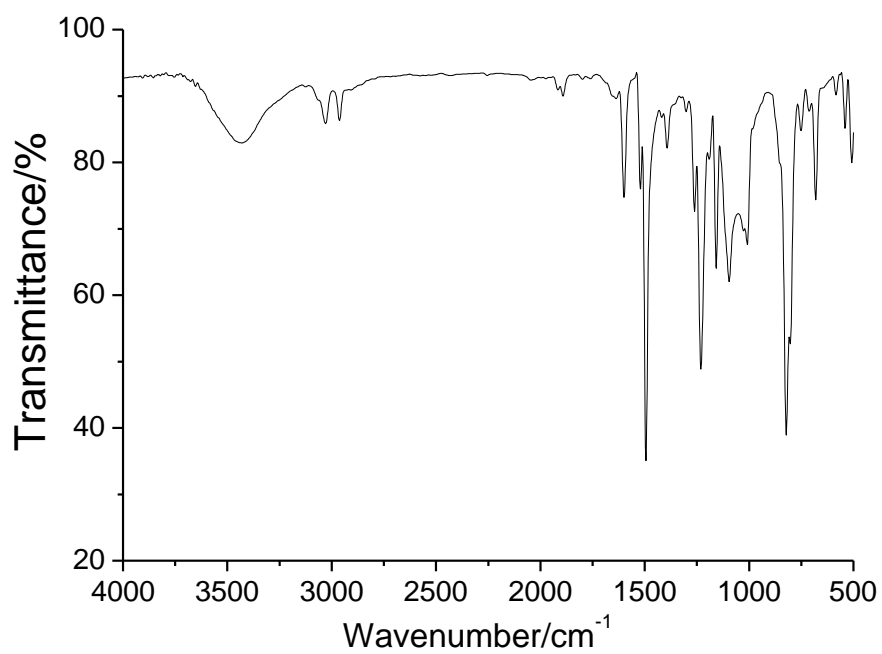

**Fig. S4** FT-IR spectrum of TPE-F4 (KBr pellets).

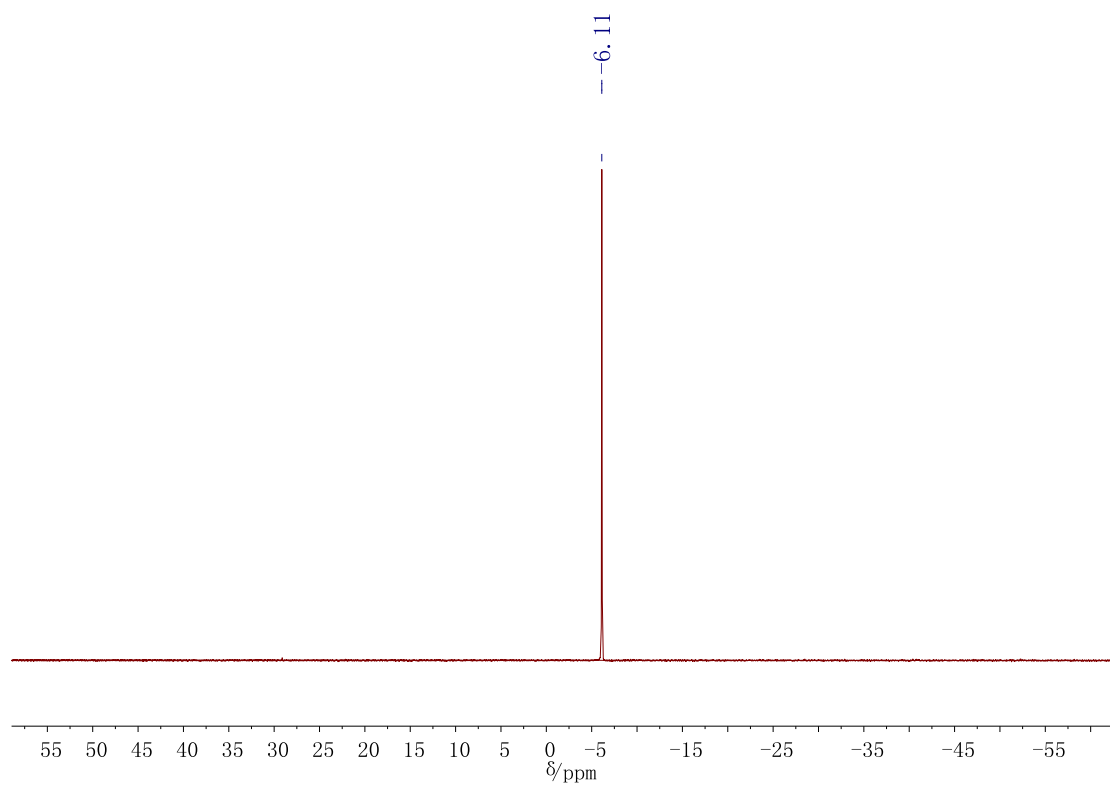

**Fig. S5**  $^{31}\text{P}\{^1\text{H}\}$  NMR spectrum ( $\text{CDCl}_3$ , 162 MHz) of L.

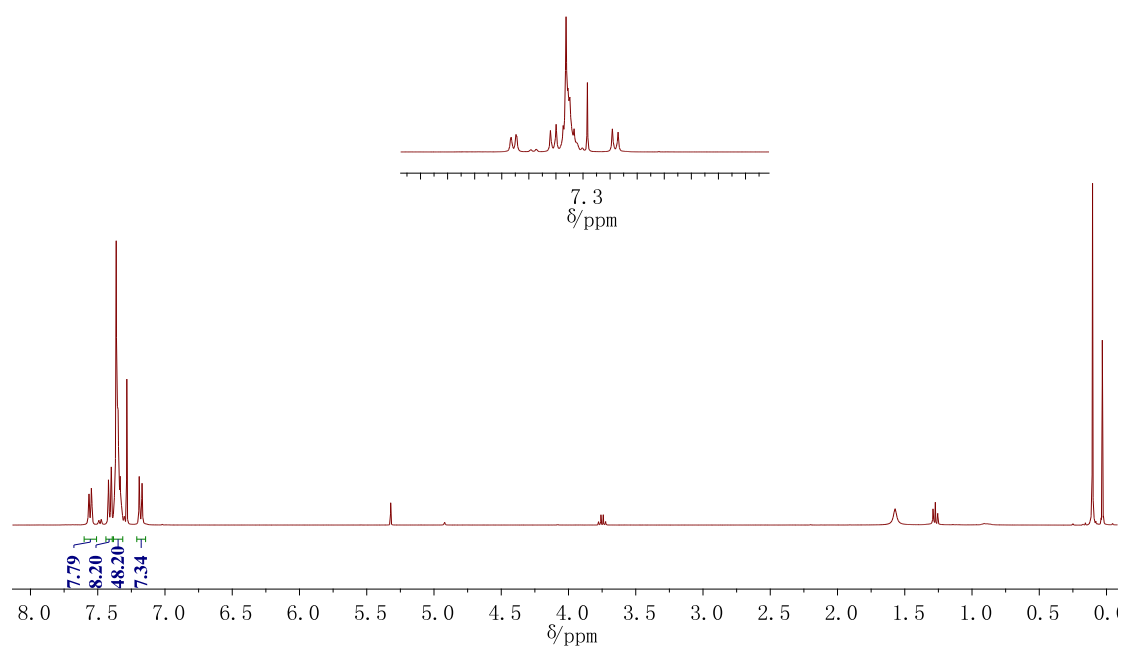

**Fig. S6**  $^1\text{H}$  NMR spectrum ( $\text{CDCl}_3$ , 400 MHz) of L.

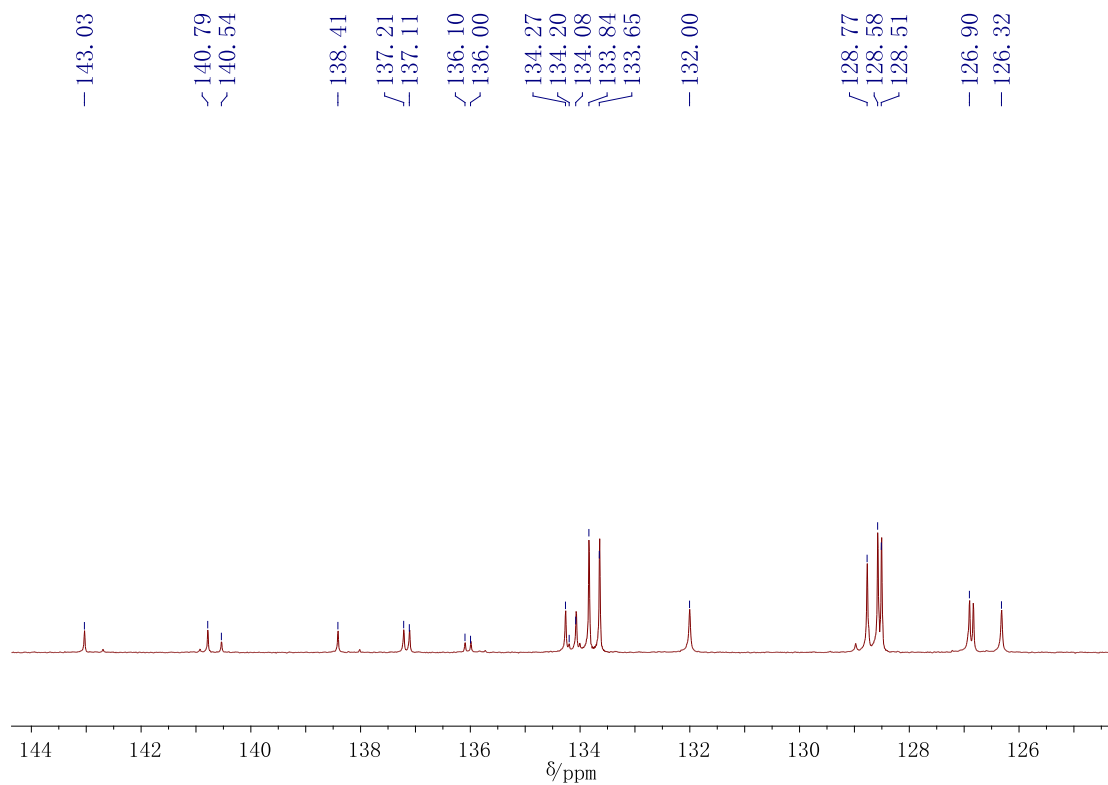

**Fig. S7**  $^{13}\text{C}$  NMR spectrum ( $\text{CDCl}_3$ , 101 MHz) of L.

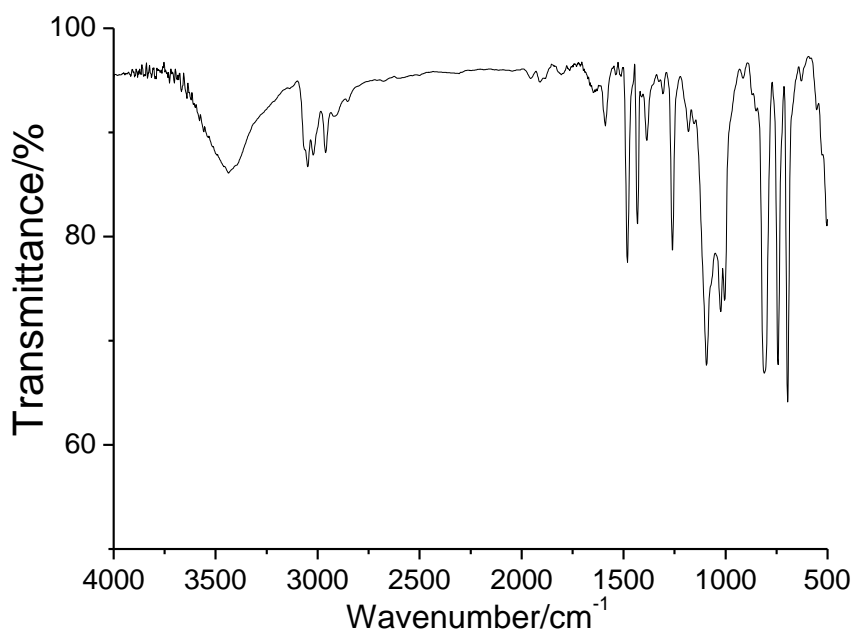

**Fig. S8** FT-IR spectrum of L (KBr pellets).

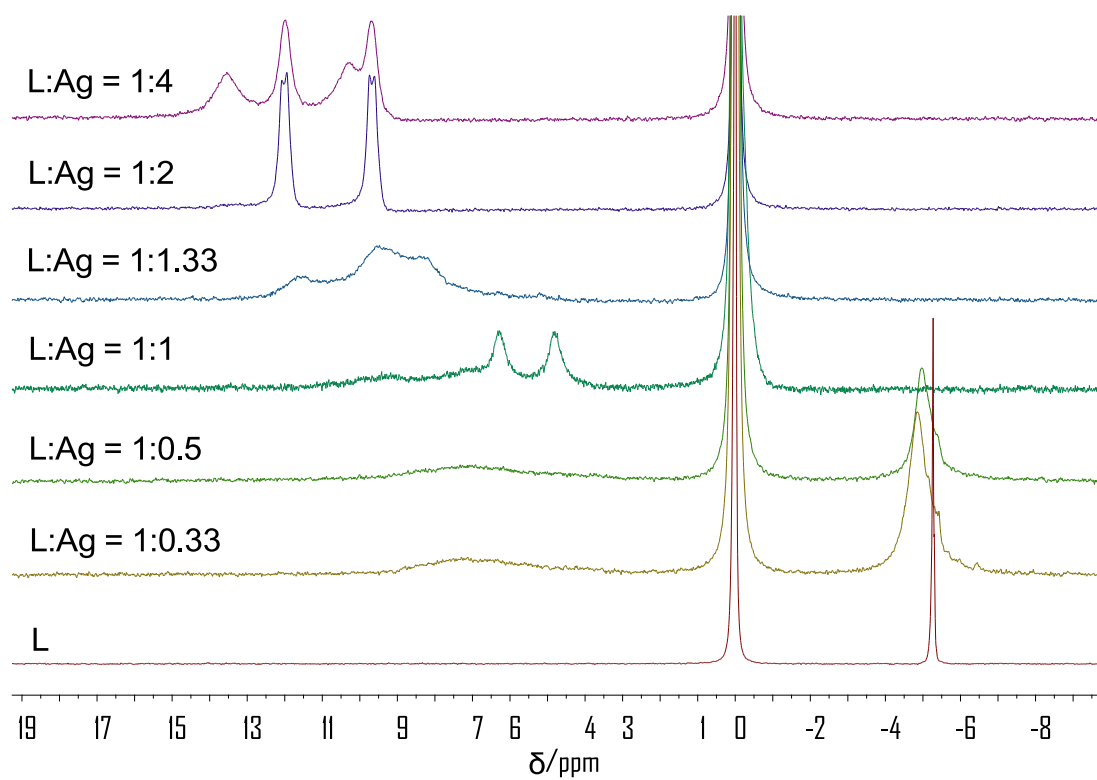

**Fig. S9**  $^{31}\text{P}\{^1\text{H}\}$  NMR titration of L with  $\text{AgBF}_4$  ( $\text{CDCl}_3\text{-MeCN}$ , 202 MHz) (reference: 85% conc.  $\text{H}_3\text{PO}_4$ ).

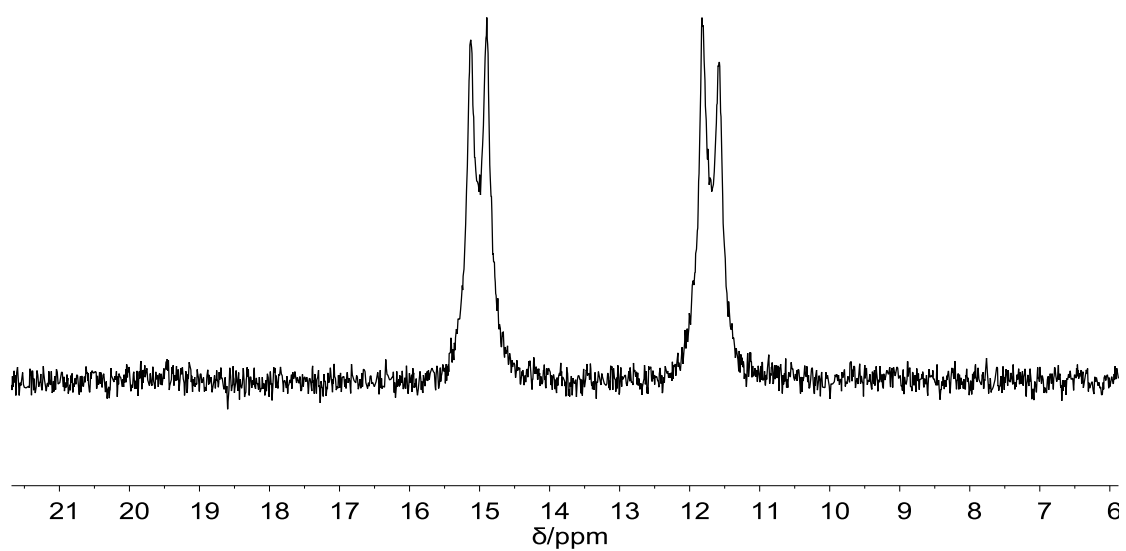

**Fig. S10**  $^{31}\text{P}\{^1\text{H}\}$  NMR spectrum ( $\text{CD}_2\text{Cl}_2$ , 162 MHz) of  $\text{Ag}_4\text{L}_2$ .

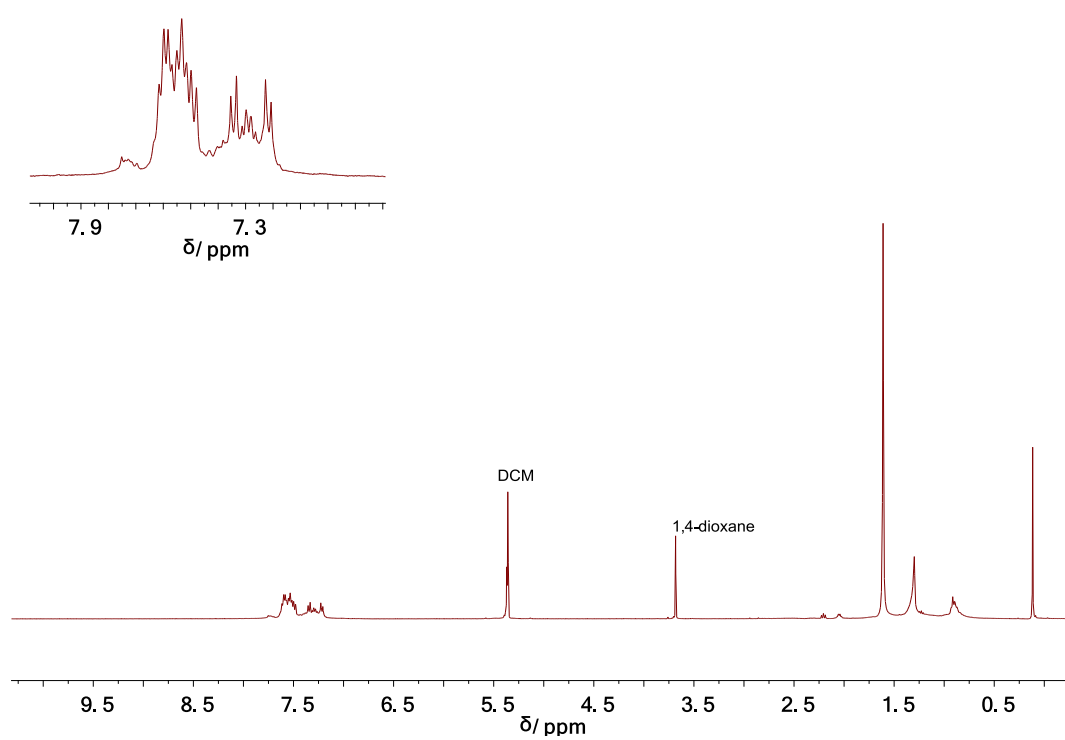

**Fig. S11**  $^1\text{H}$  NMR spectrum ( $\text{CD}_2\text{Cl}_2$ , 400 MHz) of  $\text{Ag}_4\text{L}_2$ .



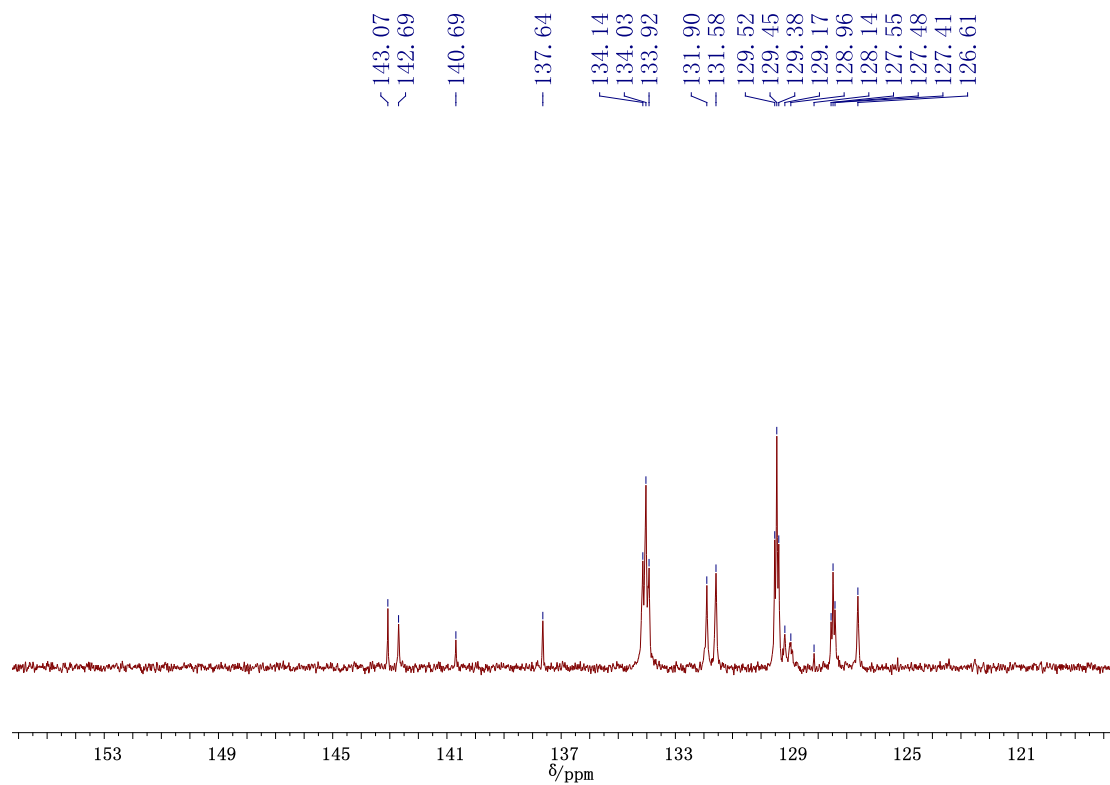

**Fig. S12**  $^{13}\text{C}$  NMR spectra ( $\text{CD}_2\text{Cl}_2$ , 75 MHz) of  $\text{Ag}_4\text{L}_2$ .

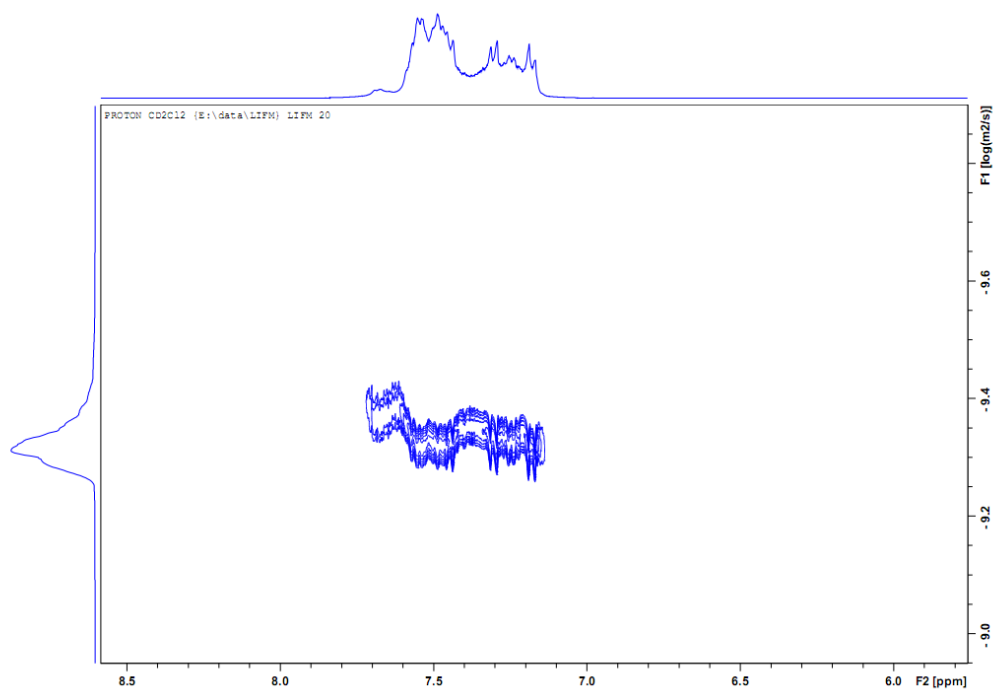

**Fig. S13** Section of  $^1\text{H}$  DOSY NMR spectrum ( $\text{CD}_2\text{Cl}_2$ , 400 MHz) of  $\text{Ag}_4\text{L}_2$ .

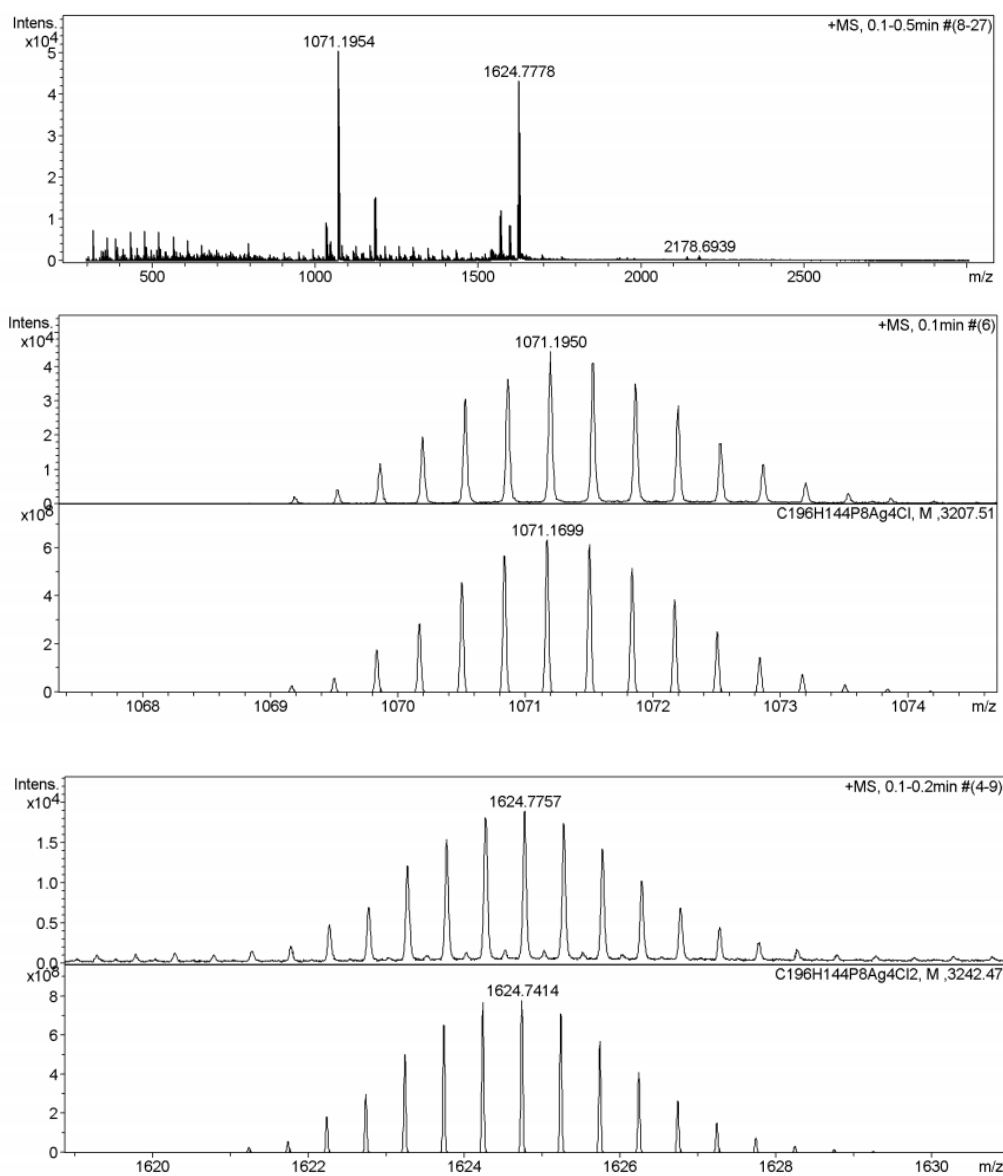

**Fig. S14** ESI-TOF-MS spectrum of  $\text{Ag}_4\text{L}_2$  in  $\text{CHCl}_3$  (diluted by MeCN), and isotopic distributions and simulations of some key peaks. HRMS:  $m/z$  found (calcd) for  $[\text{Ag}_4\text{L}_2+\text{Cl}]^{3+}$ , 1071.1699 (1071.1796);  $[\text{Ag}_4\text{L}_2+2\text{Cl}]^{2+}$ , 1624.7775 (1624.7414).

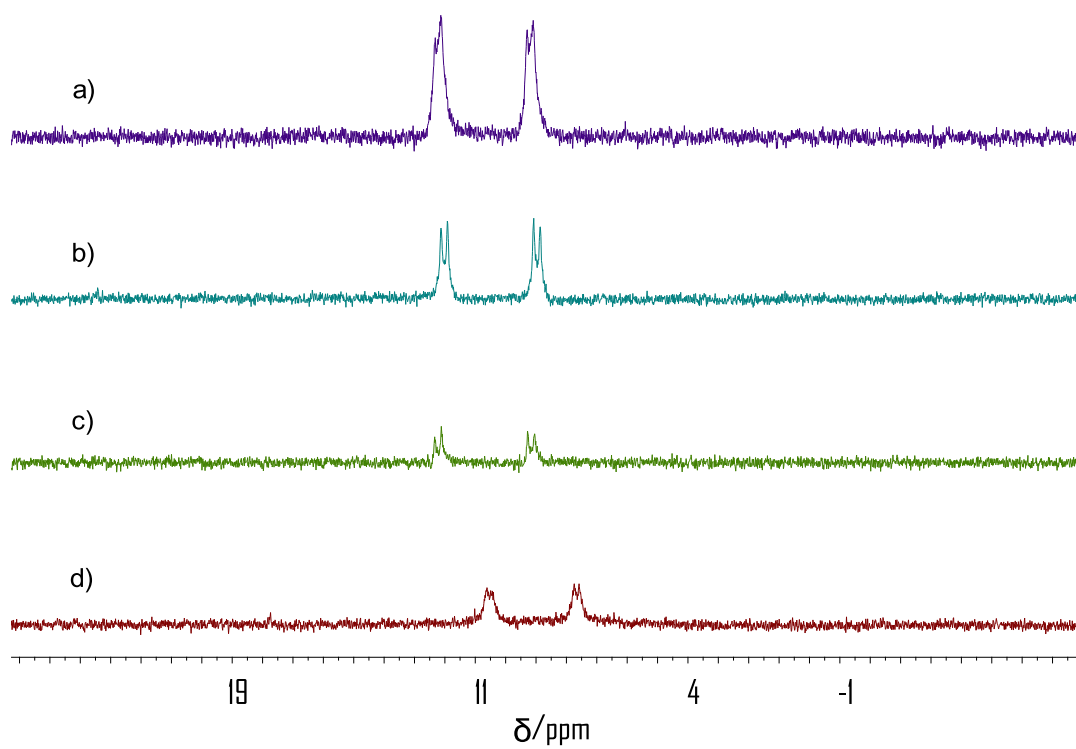

**Fig. S15**  $^{31}\text{P}\{^1\text{H}\}$  NMR (298 K, 162 MHz) spectra for mixtures of L and  $\text{Ag}^+$  with different anions (Ag:L = 2:1), a)  $\text{NO}_3^-$ ; b)  $\text{BF}_4^-$ ; c)  $\text{SbF}_6^-$  in toluene-methanol (v:v = 1:1), and d) OTf in  $\text{CD}_3\text{CN}$ .

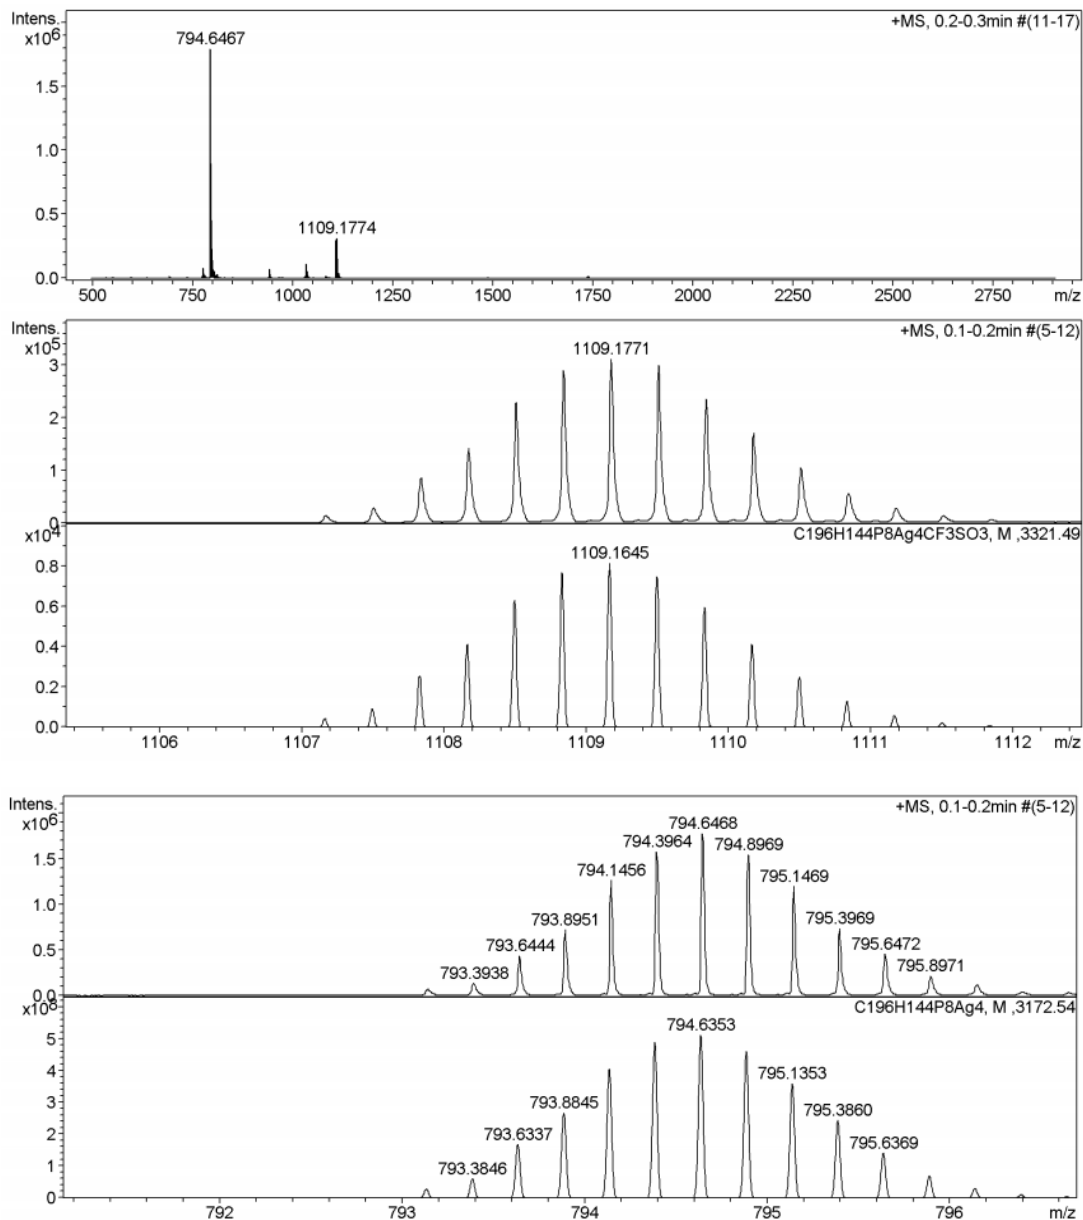

**Fig. S16** ESI-TOF-MS spectrum of mixtures of L and AgOTf (L:Ag = 1:2) in toluene–methanol (v:v = 1:1). HRMS:  $m/z$  found (calcd.) for  $[\text{Ag}_4\text{L}_2+\text{OTf}]^{3+}$ , 1109.1771 (1109.1645);  $[\text{Ag}_4\text{L}_2]^{4+}$ , 794.6468 (794.6353).

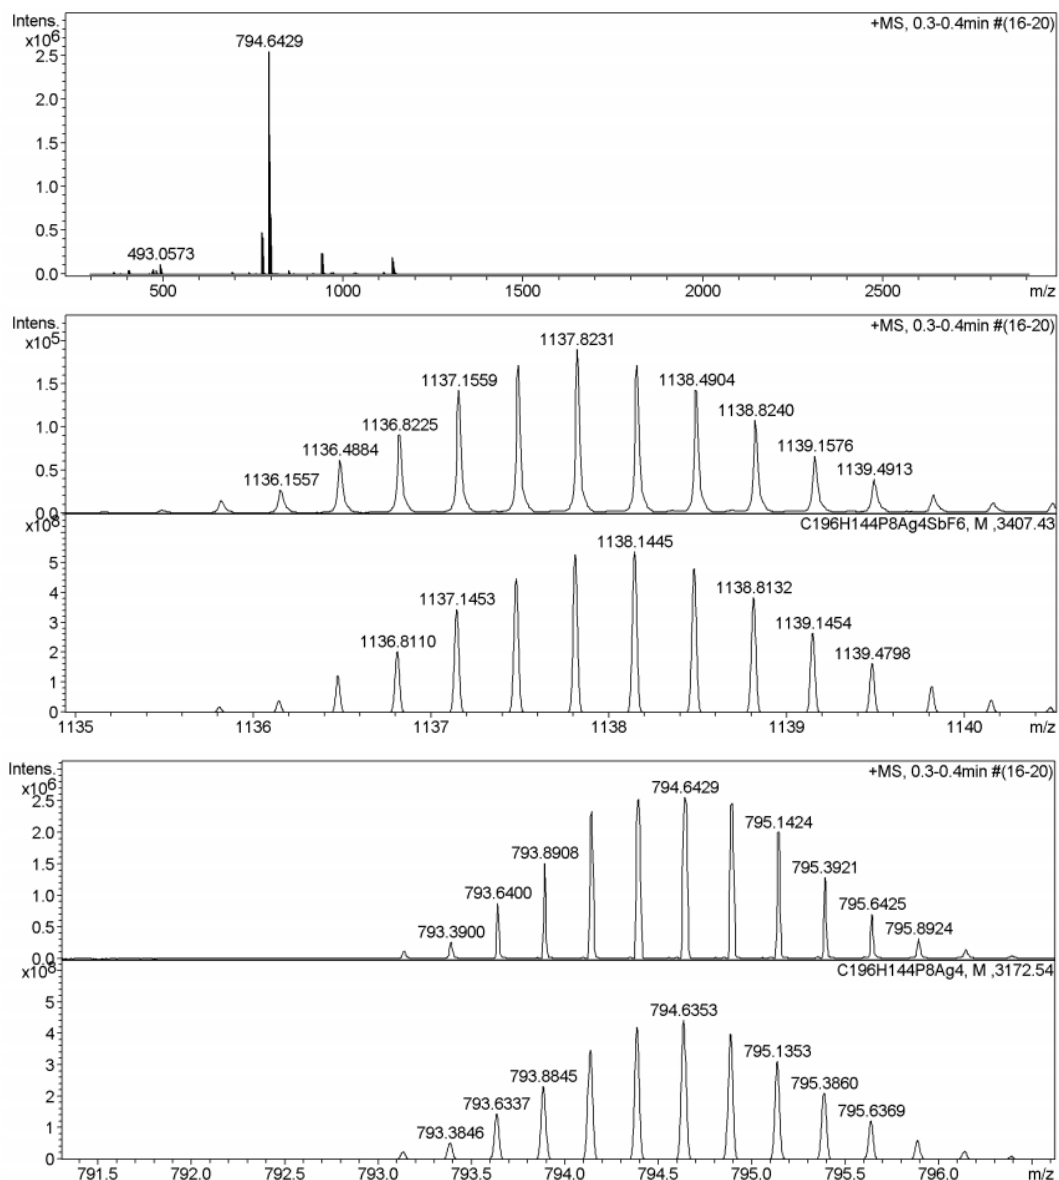

**Fig. S17** ESI-TOF-MS spectrum of mixtures of L and AgSbF<sub>6</sub> (L:Ag = 1:2) in toluene–methanol (v:v = 1:1). HRMS: *m/z* found (calcd.) for [Ag<sub>4</sub>L<sub>2</sub>+SbF<sub>6</sub>]<sup>3+</sup>, 1137.8231 (1137.8118); [Ag<sub>4</sub>L<sub>2</sub>]<sup>4+</sup>, 794.6429 (794.6353).

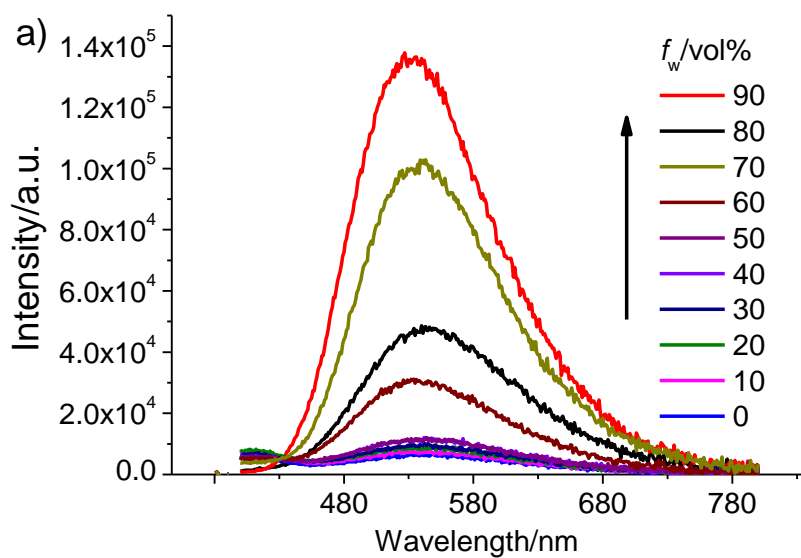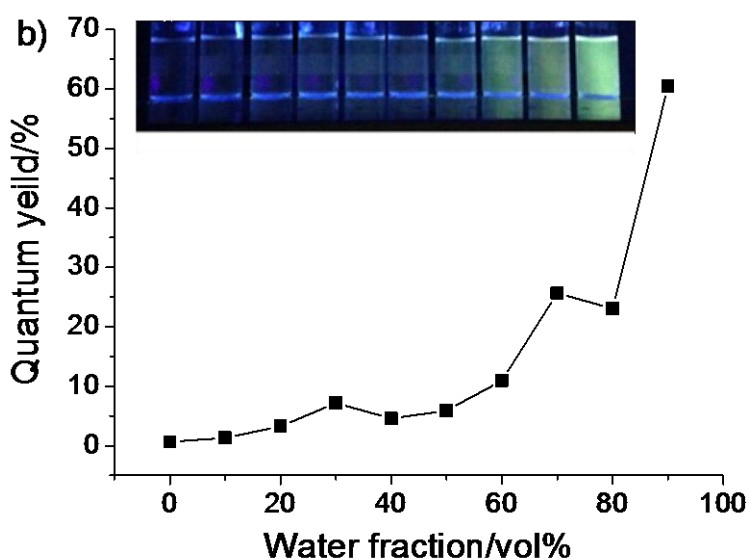

**Fig. S18** a) Photoluminescence spectra of L in THF–water mixtures with different water fractions ( $f_w$ ) and in pure THF ( $f_w = 0\%$ ). b) Variations of fluorescence quantum yields of L with water fractions in THF/water mixtures.  $c = 1.82 \times 10^{-5} \text{ mol L}^{-1}$ ;  $\lambda_{\text{ex}} = 310 \text{ nm}$ . Inset shows the photos of L in pure THF and THF-water mixtures taken under UV light (365 nm) (from left to right: 0  $\rightarrow$  90% H<sub>2</sub>O fraction/vol%).

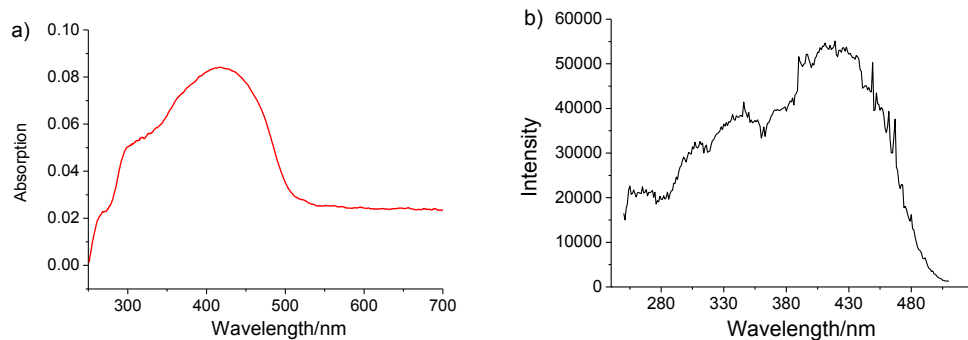

**Fig. S19** a) UV-vis absorption spectrum of L in solid state and b) excitation spectrum of L in solid state ( $\lambda_{em} = 530$  nm).

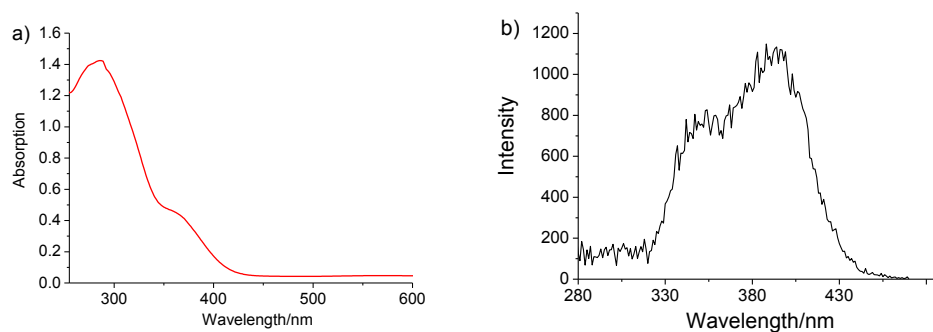

**Fig. S20** a) UV-vis absorption and b) excitation spectra of L in  $\text{CHCl}_3$  ( $c = 1.53 \times 10^{-5}$  mol  $\text{L}^{-1}$ ) ( $\lambda_{em} = 490$  nm).

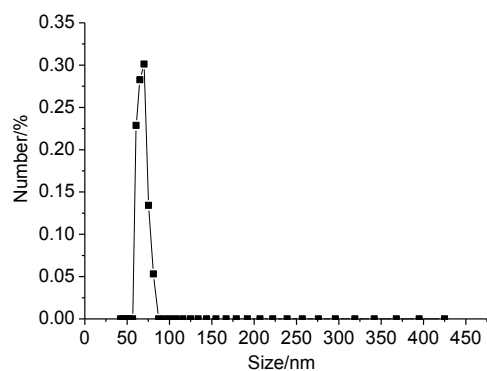

**Fig. S21** Size distributions of L in THF-water mixture ( $f_w = 90\%$ ,  $c = 1.82 \times 10^{-5}$  mol  $\text{L}^{-1}$ ).

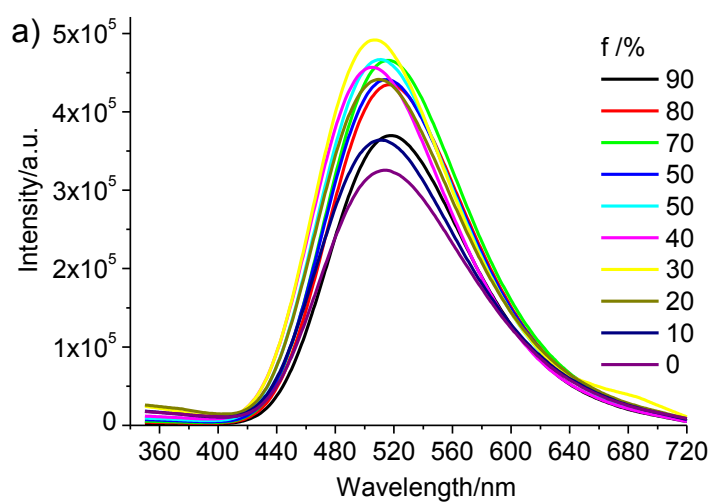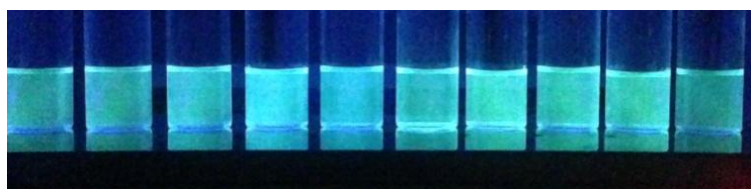

b)

**Fig. S22** a) Fluorescence emission spectra of  $\text{Ag}_4\text{L}_2$  in  $\text{CH}_2\text{Cl}_2$ -hexane mixtures with the volume fractions of hexane ( $f$ ) varying in the range of 0-90% ( $1.42 \times 10^{-5} \text{ mol L}^{-1}$ ,  $\lambda_{\text{ex}} = 310 \text{ nm}$ ). b) Photos of  $\text{Ag}_4\text{L}_2$  in pure  $\text{CH}_2\text{Cl}_2$  and  $\text{CH}_2\text{Cl}_2$ -hexane mixtures taken under UV light (365 nm) (from left to right: 0  $\rightarrow$  90% hexane fraction/vol%).

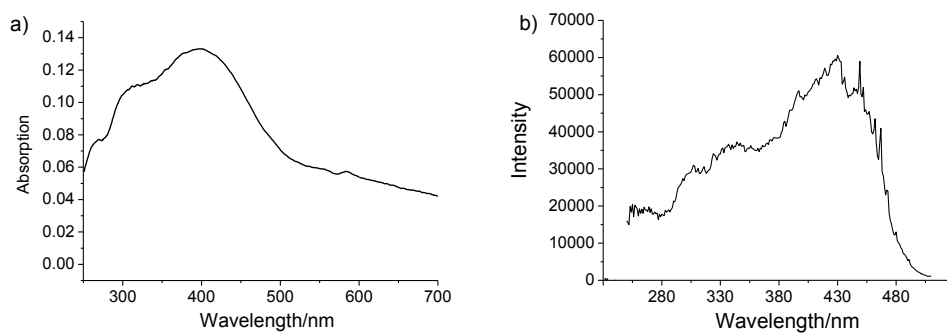

**Fig. S23** a) UV-vis absorption spectrum of  $\text{Ag}_4\text{L}_2$  in solid state and b) excitation spectrum of  $\text{Ag}_4\text{L}_2$  in solid state ( $\lambda_{\text{em}} = 530 \text{ nm}$ ).



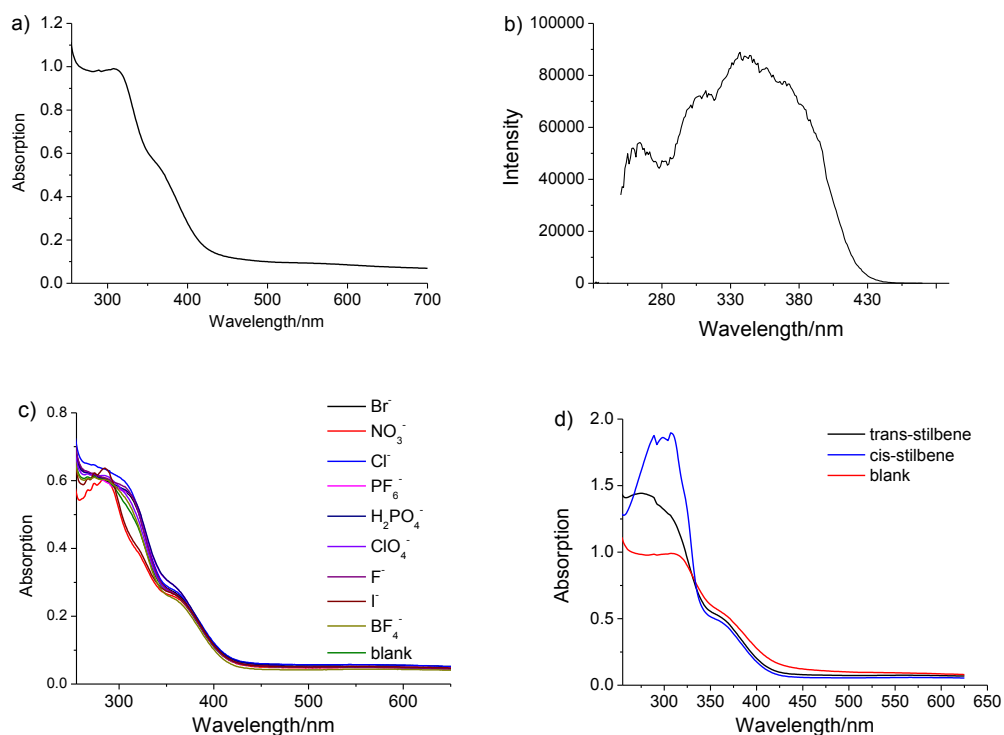

**Fig. S24** a) UV-vis absorption and b) excitation spectra of  $\text{Ag}_4\text{L}_2$  in  $\text{CHCl}_3$  ( $c = 1.42 \times 10^{-5} \text{ mol L}^{-1}$ ) ( $\lambda_{\text{em}} = 490 \text{ nm}$ ), c) UV-vis spectra of  $\text{Ag}_4\text{L}_2$  in  $\text{CHCl}_3$  ( $7.99 \times 10^{-6} \text{ mol L}^{-1}$ ) in the presence of four equiv TBA salts of anions, d) UV-vis spectra of  $\text{Ag}_4\text{L}_2$  in  $\text{CHCl}_3$  ( $1.69 \times 10^{-5} \text{ mol L}^{-1}$ ) in the presence of four equiv aromatic compounds, cis-stilbene, trans-stilbene and blank.

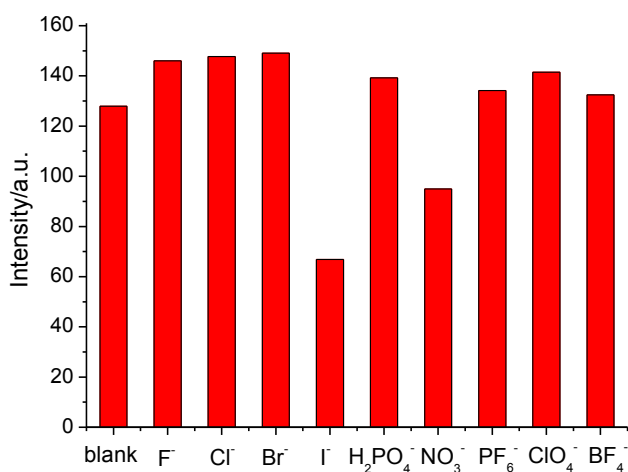

**Fig. S25** Photoluminescence intensity upon addition of various TBA salts of anions of  $\text{Ag}_4\text{L}_2$  in  $\text{CHCl}_3$  ( $7.99 \times 10^{-6} \text{ mol L}^{-1}$ ,  $\lambda_{\text{ex}} = 310 \text{ nm}$ ) in the presence of 4 equiv TBA salts of anions.

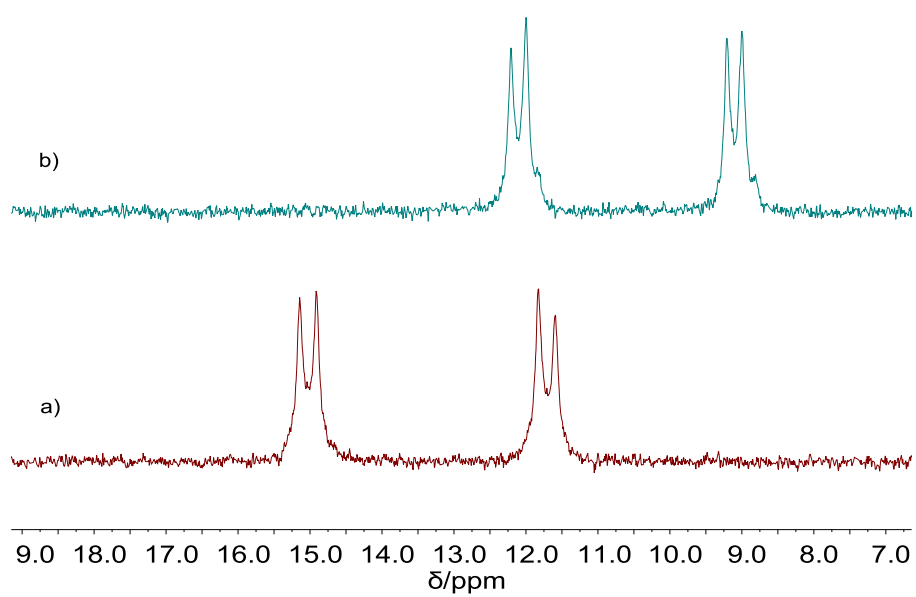

**Fig. S26**  $^{31}\text{P}\{^1\text{H}\}$  NMR spectrum ( $\text{CD}_2\text{Cl}_2$ , 162 MHz) of  $\text{Ag}_4\text{L}_2$ , a) blank ( $J_{^{109}\text{Ag}-^{31}\text{P}} = 500$  Hz), b) upon addition of excess  $\text{NO}_3\text{NBu}_4$  ( $J_{^{109}\text{Ag}-^{31}\text{P}} = 452$  Hz).

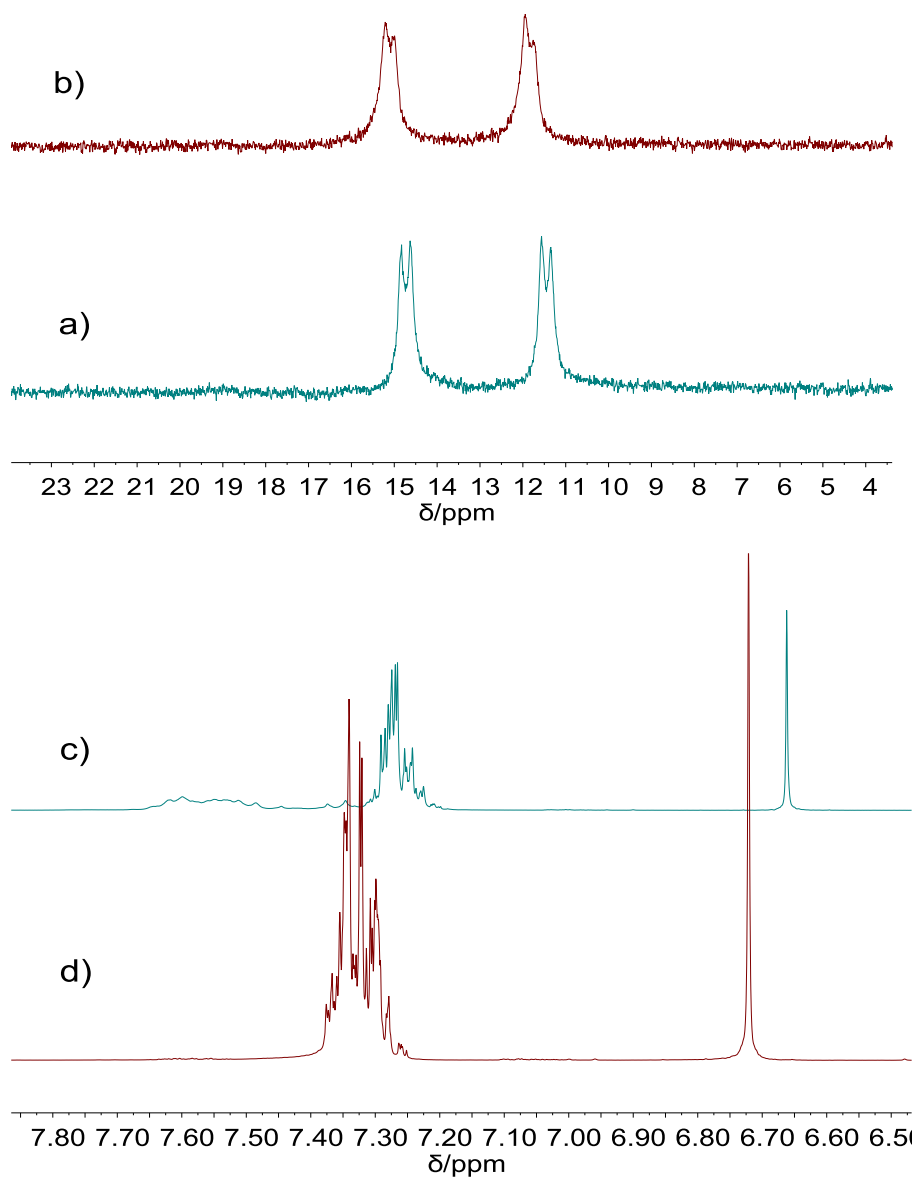

**Fig. S27**  $^{31}\text{P}\{^1\text{H}\}$  NMR spectrum ( $\text{CD}_2\text{Cl}_2$ , 162 MHz) (top) and  $^1\text{H}$  NMR ( $\text{CD}_2\text{Cl}_2$ , room temperature, 400 MHz) (bottom) of  $\text{Ag}_4\text{L}_2$ , a) blank, b,c) upon addition of excess cis-stilbene (Note the olefin H change on the high field) and d) cis-stilbene.

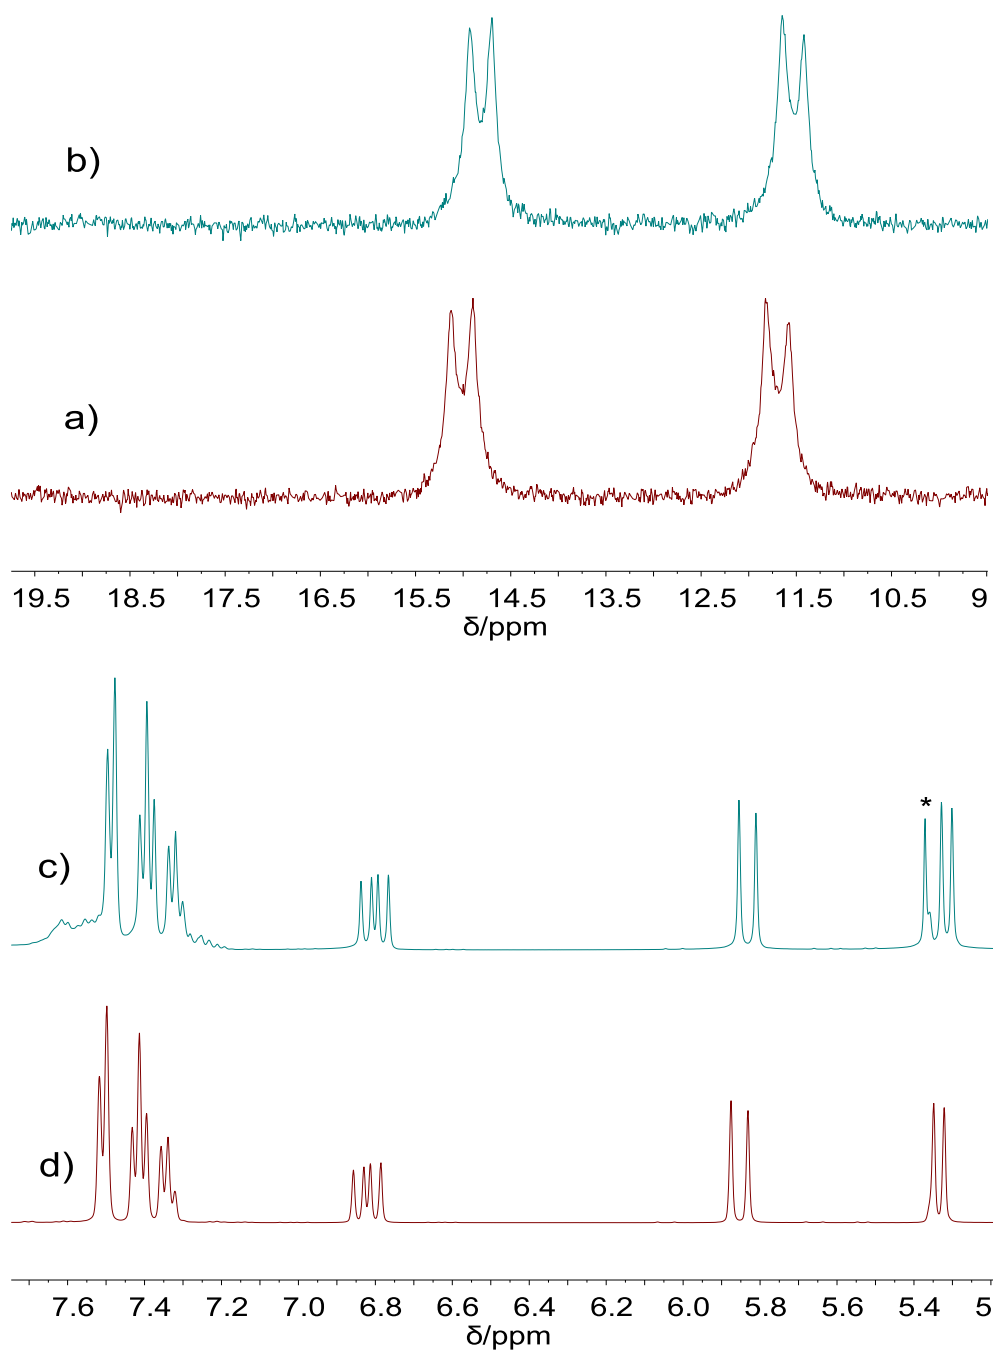

**Fig. S28**  $^{31}\text{P}\{^1\text{H}\}$  NMR spectrum ( $\text{CD}_2\text{Cl}_2$ , 162 MHz) (top) and  $^1\text{H}$  NMR ( $\text{CD}_2\text{Cl}_2$ , room temperature, 400 MHz) (bottom) of  $\text{Ag}_4\text{L}_2$ , a) blank, b,c) upon addition of excess styrene (\* is due to  $\text{CD}_2\text{Cl}_2$ ) and d) styrene.

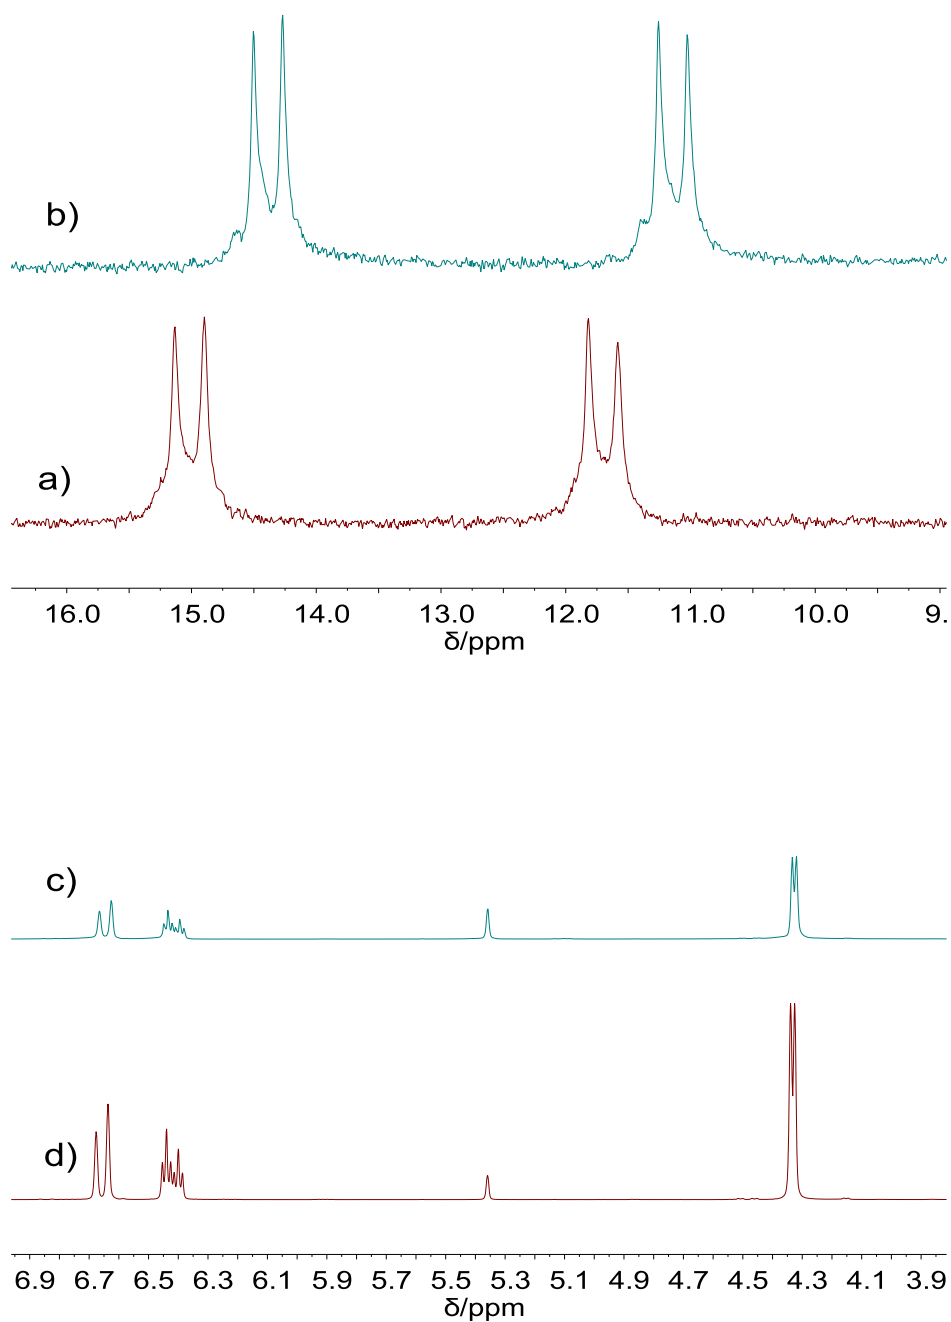

**Fig. S29**  $^{31}\text{P}\{^1\text{H}\}$  NMR spectrum ( $\text{CD}_2\text{Cl}_2$ , 162 MHz) (top) and  $^1\text{H}$  NMR ( $\text{CD}_2\text{Cl}_2$ , room temperature, 400 MHz) (bottom) of  $\text{Ag}_4\text{L}_2$ , a) blank, b,c) upon addition of excess cinnamyl alcohol, and d) cinnamyl alcohol. The NMR change is probably due to the  $\text{Ag}\dots\text{OH}(\text{alcohol})$  interaction.

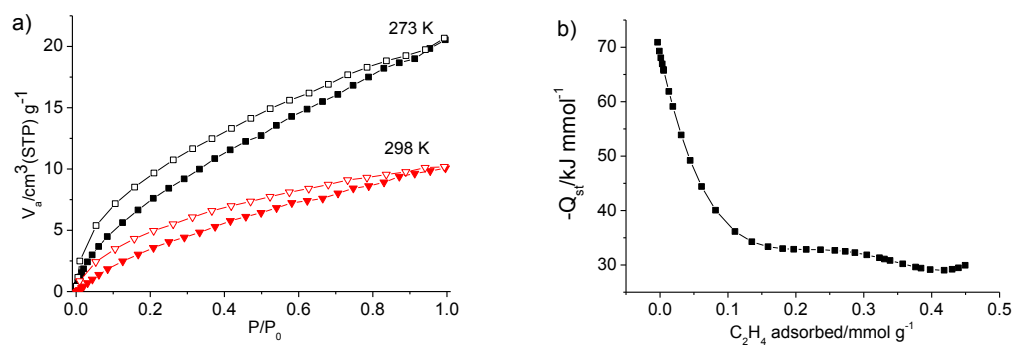

**Fig. S30** a)  $C_2H_4$  sorption isotherms of  $Ag_4L_2$  at 273 and 298 K (filled, adsorption; unfilled, desorption), and b) The isosteric heat of adsorption,  $Q_{st}$  of  $C_2H_4$ .
